# Supplementary material for: Electron transfer and intersystem crossing triggered fluorescence quenching detection of mercury ions
Source: Royal Society of Chemistry journal article supplement (doi:10.1039/c9cp02879j), 2019-01-01
Supplement: c9cp02879j1.pdf [file c9cp02879j1.pdf]

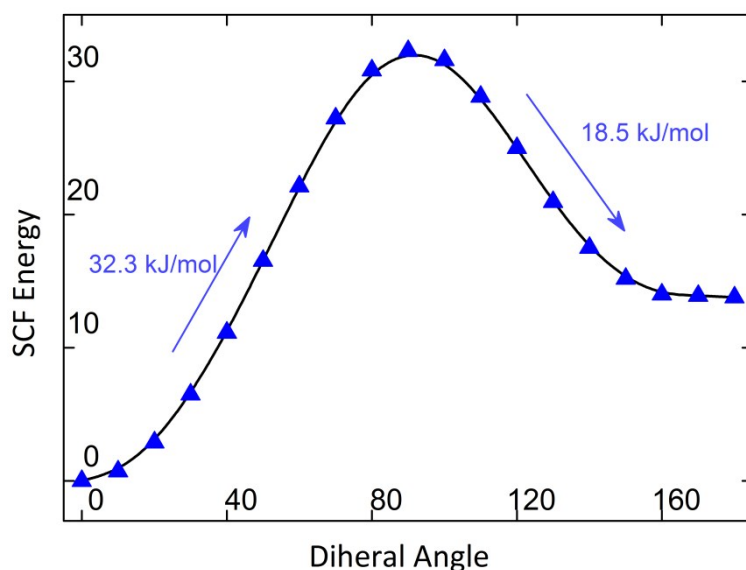

Figure S1 Energy profiles by relaxed scan of the N2C2C1N3 dihedral of L.

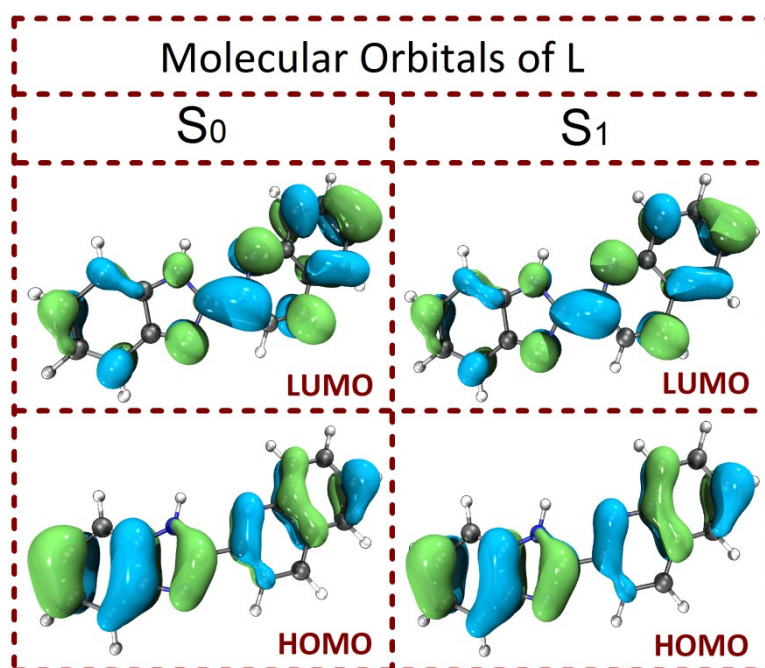

Figure S2 Molecular orbitals involved in the excitation and emission processes of L.

As is known,  $\text{Hg}^{2+}$  mainly exhibits two coordination models when interacting with a Lewis base. On one hand, by coordinating with three electron donors, a triangle is usually formed. On the other, by coordinating with four electron donors, a tetrahedral is usually formed. Density functional study is performed to check the chances of availability of the two organometallics. As is shown in Figure S3, the  $\text{Hg}^{2+}$  trends to form three coordination bonds with electron donors other than four. A tetra-coordinated starting geometry used for geometry optimization eventually leads to a tri-coordinated optimized geometry (Figure S4).

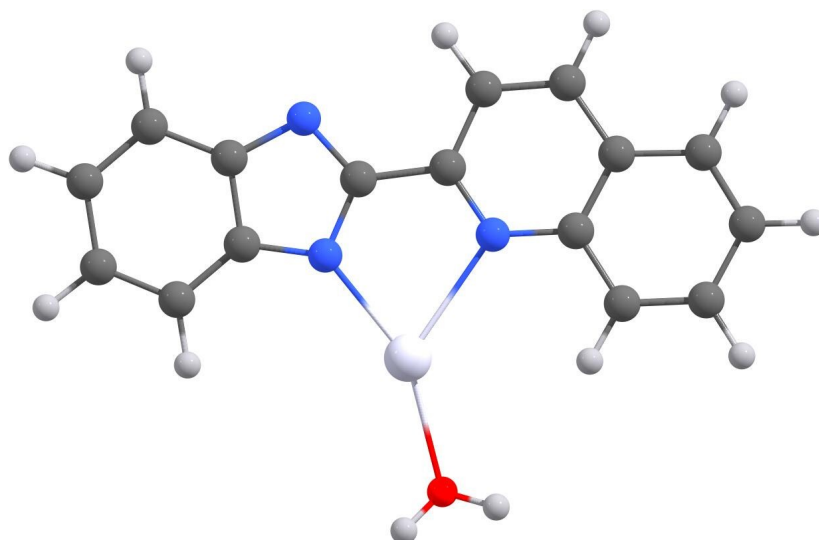

Figure S3 Optimized tri-coordinated structure.

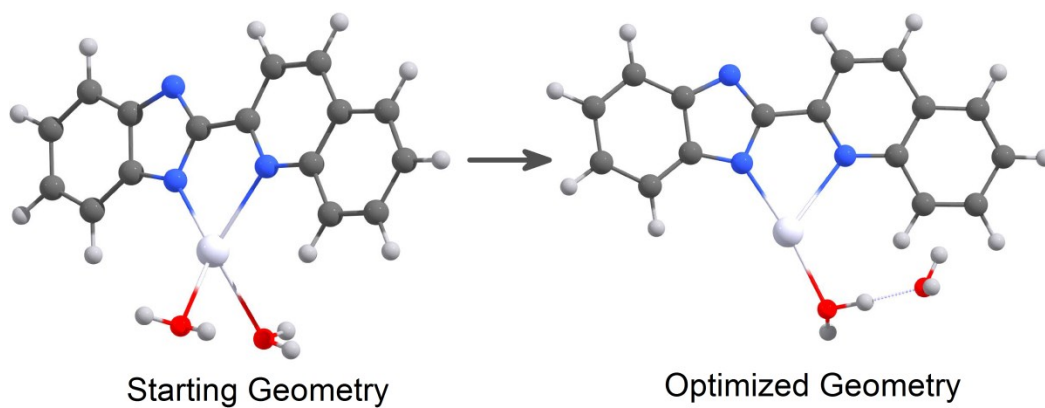

Figure S4 Starting geometry and optimized geometry for tetra-coordinated Hg-L.

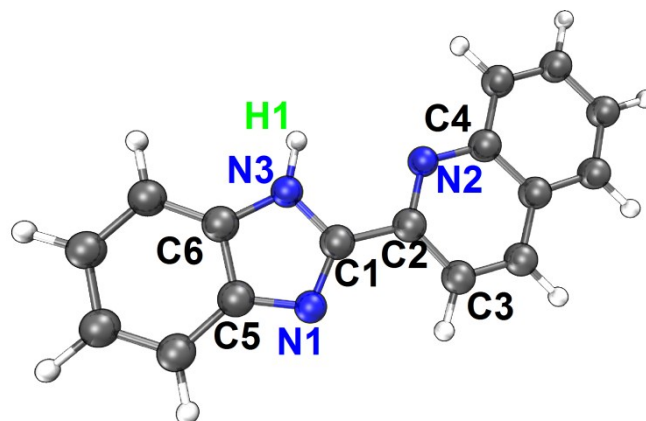

Figure S5 Optimized ground state structure of probe L.

Table S1 Structural information of probe L in S<sub>0</sub> state.

| Structural information | Value                    |
|------------------------|--------------------------|
| Bond                   | Bond Length (Å)          |
| C1-C2                  | 1.466                    |
| C1-N3                  | 1.366                    |
| C1-N1                  | 1.319                    |
| C2-N2                  | 1.320                    |
| C5-C6                  | 1.415                    |
| C2-C3                  | 1.418                    |
| Angle                  | Angle Value (°)          |
| C2-C1-N3               | 121.6                    |
| C1-C2-N2               | 116.5                    |
| C2-C1-N1               | 125.8                    |
| C1-C2-C3               | 120.1                    |
| Dihedral Angle         | Dihedral Angle Value (°) |
| N2-C2-C1-N3            | 0.0                      |
